# Supplementary material
Source: publisher site journal article supplement (https://www.dovepress.com/article/412782)
Supplement: Supplementary file 1 [file get_supplementary_file.php]

**Supplemental Table 1. Correlation values controlled for age or sex compared to original values for tense arousal versus pain intensity, pain unpleasantness and stimulus salience.**

| **Comparison** | **Original R-value** | **R-value controlling for Age** | **R-value controlling for Sex** |
| --- | --- | --- | --- |
| TA versus Salience (CPT) | 0.380 | 0.328 | 0.378 |
| TA versus PI (CPT) | -0.0084 | -0.059 | -0.0092 |
| TA versus PU (CPT) | 0.189 | 0.086 | 0.189 |
| Partial 1: TA versus Salience (CPT) | 0.433 | 0.447 | 0.439 |
| Partial 1: TA versus PI (CPT) | -0.385 | -0.326 | -0.391 |
| Partial 1: TA versus PU (CPT) | 0.138 | 0.037 | 0.127 |
| TA versus Salience (HAB) | 0.284 | 0.291 | 0.279 |
| TA versus PI (HAB) | -0.019 | -0.017 | -0.015 |
| TA versus PU (HAB) | 0.283 | 0.258 | 0.278 |
| Partial 2: TA versus Salience (HAB) | 0.292 | 0.311 | 0.293 |
| Partial 2: TA versus PI (HAB) | -0.426 | -0.411 | -0.423 |
| Partial 2: TA versus PU (HAB) | 0.298 | 0.252 | 0.299 |
| PI versus PU (CPT) | 0.839 | 0.847 | 0.839 |
| PI versus Salience (CPT) | 0.767 | 0.679 | 0.679 |
| PU versus Salience (CPT) | 0.684 | 0.753 | 0.779 |
| Change in PI versus change in PU (CPT) | 0.908 | 0.894 | 0.908 |
| Change in PI versus change in Salience (CPT) | 0.886 | 0.871 | 0.883 |
| Change in PU versus change in Salience (CPT) | 0.938 | 0.930 | 0.938 |
| PI versus PU (HAB) | 0.729 | 0.740 | 0.737 |
| PI versus Salience (HAB) | 0.721 | 0.721 | 0.728 |
| PU versus Salience (HAB) | 0.738 | 0.747 | 0.736 |
| Change in PI versus change in PU (HAB) | 0.378 | 0.288 | 0.407 |
| Change in PI versus change in Salience (HAB) | 0.534 | 0.581 | 0.533 |
| Change in PU versus change in Salience (HAB) | 0.498 | 0.543 | 0.543 |

Notes: CPT – Continuous Performance Task; HAB – Habituation; TA – Tense Arousal; PI – Pain Intensity; PU – Pain Unpleasantness.

**Supplemental Table 2. Correlation values controlled for age or sex compared to original values for tense arousal versus state and trait anxiety and neuroticism.**

| **Comparison** | **Original R-value** | **R-value controlling for Age** | **R-value controlling for Sex** |
| --- | --- | --- | --- |
| TA versus STA (CPT) | 0.268 | 0.241 | 0.268 |
| TA versus NEO_N (CPT) | 0.353 | 0.195 | 0.351 |
| TA versus TRA (CPT) | 0.132 | 0.092 | 0.124 |
| Partial 3: TA versus STA (CPT) | 0.134 | 0.176 | 0.125 |
| Partial 3: TA versus NEO_N (CPT) | 0.291 | 0.105 | 0.288 |
| Partial 3: TA versus TRA (CPT) | -0.142 | -0.082 | -0.142 |
| TA versus STA (HAB) | 0.529 | 0.519 | 0.519 |
| TA versus NEO_N (HAB) | 0.401 | 0.345 | 0.397 |
| TA versus TRA (HAB) | 0.154 | 0.131 | 0.139 |
| Partial 4: TA versus STA (HAB) | 0.459 | 0.460 | 0.454 |
| Partial 4: TA versus NEO_N (HAB) | 0.266 | 0.186 | 0.251 |
| Partial 4: TA versus TRA (HAB) | -0.262 | -0.243 | -0.248 |

Notes: CPT – Continuous Performance Task; HAB – Habituation; TA – Tense Arousal; STA –State Anxiety; NEO_N – Neuroticism; TRA – Trait Anxiety.
